# Supplementary material for: Effect of Fe-doping on bending elastic properties of single-crystalline rutile TiO2 nanowires
Source: Royal Society of Chemistry journal article supplement (doi:10.1039/d0na00284d), 2020-01-01
Supplement: d0na00284d1.pdf [file d0na00284d1.pdf]

## Supporting Information

### Effect of Fe-doping on bending elastic properties of single-crystalline rutile TiO<sub>2</sub> nanowires

*Qiong Liu,<sup>a</sup> Haifei Zhan,<sup>a,b</sup> Yihan Nie,<sup>a</sup> Yanan Xu,<sup>a</sup> Huaiyong Zhu,<sup>a</sup> Ziqi Sun,<sup>a</sup>*

*John Bell,<sup>c</sup> Arinxin Bo,<sup>\*a</sup> Yuantong Gu<sup>\*a,b</sup>*

<sup>a</sup>School of Mechanical, Medical and Process Engineering, Queensland University of  
Technology (QUT), Brisbane, Queensland 4001, Australia

<sup>b</sup>Center for Materials Science, Queensland University of Technology (QUT),  
Brisbane, Queensland 4001, Australia

<sup>c</sup>University of Southern Queensland, Ipswich, Queensland 4300, Australia

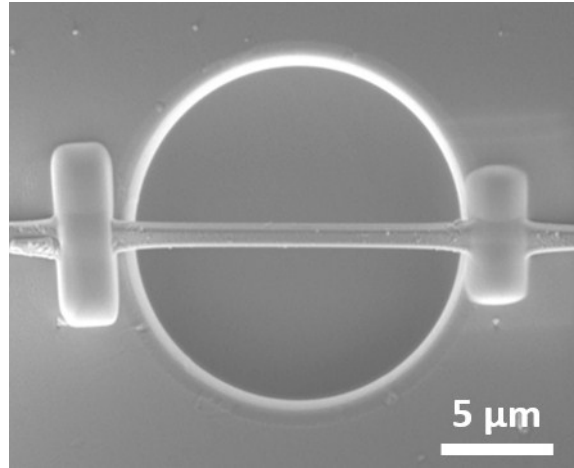

**Fig. S1** A TiO<sub>2</sub> NW after three-point bending tests without local residual indentation observed.

### Calculation Method of Second Moment

To measure the cross-sectional areas of the NW beams, these NW samples were cut using FIB to expose their cross sections (Fig. S2a). Since the stage of the sample was tilted with an angle of 52° to view the cross section, the measurement of the cross-sectional area was corrected via MATLAB. The calculation of the second moment,  $I$ , of the cross section is based on that of a polygon. During the MATLAB imaging process, a polygon outlines the projection of the NW's cross section, as is seen in Fig. S2b and S2c. In the calculating process, the loading direction was known normal to the NW beam ( $x$  direction), thus  $I_x$  that is the component of  $I$  was applied in equation (1). As shown in Fig. S2c, the values of  $A$  and  $I_x$  for this NW were output. This calculation method can remarkably reduce the calculation error of the Young's modulus of a NW with an irregular cross section.

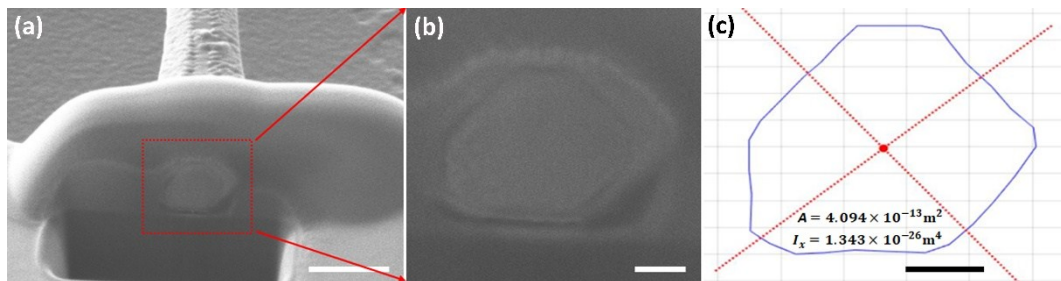

**Fig. S2** calculation method of the cross-sectional area and the second moment. (a) SEM image showing that the NW was cut near the welding end. (b) Magnified SEM image of the projection of the cross section. (c) A polygon corresponding to (b) obtained by MATLAB imaging

process, outlining the projection of the NW's cross section. Scale bar, 1  $\mu\text{m}$  (a), 200 nm (b) and (c).
